# Supplementary material
Source: Springer Nature journal article supplement (https://www.springermedizin.de/resource/supplementary/12876_2010_451_MOESM8_ESM.pdf/9437038)

**A****Disease Activity Index**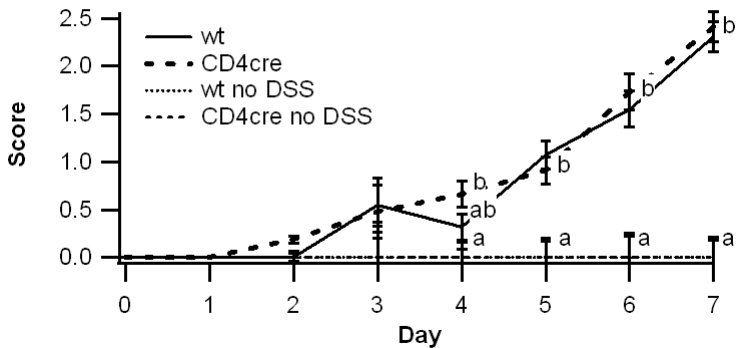**B****Body Weight loss during DSS challenge**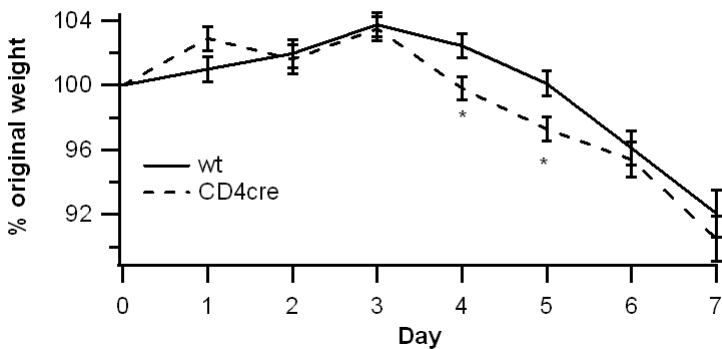

Supplement: MOESM8 [file 9437038]
